# Supplementary material for: More robust detection of motifs in coexpressed genes by using phylogenetic information
Source: Springer Nature journal article supplement (doi:10.1186/1471-2105-7-160), 2006-03-20
Supplement: 12859_2005_899_MOESM1_ESM.pdf [file 12859_2005_899_MOESM1_ESM.pdf]

## Supplementary data file 1:

Performance of the different motif detection algorithms on the different test data sets: Recovery rate (rec) and the sensitivity (sens) and specificity (spec) for the different motif models. In the last column, the average value taken over the different motif models is displayed. A) performance of the new methodology B) performance of AlignACE C) performance of PhyloCon.

Table 1.A

| #<br>Randomgenes | Fur |      |      | Metj |      |      | LexA |      |      | PhoP |      |      | Overall |      |      |
|------------------|-----|------|------|------|------|------|------|------|------|------|------|------|---------|------|------|
|                  | Rec | Sens | Spec | Rec  | Sens | Spec | Rec  | Sens | Spec | Rec  | Sens | Spec | Rec     | Sens | Spec |
| 10               | 40  | 90   | 100  | 100  | 100  | 100  | 90   | 89   | 100  | 90   | 58   | 82   | 80      | 84   | 95   |
| 20               | 50  | 80   | 90   | 100  | 100  | 100  | 100  | 82   | 100  | 80   | 58   | 91   | 83      | 80   | 95   |
| 30               | 50  | 84   | 97   | 90   | 100  | 97   | 90   | 91   | 96   | 100  | 56   | 92   | 83      | 83   | 95   |
| 40               | 50  | 80   | 79   | 90   | 100  | 100  | 90   | 76   | 96   | 100  | 56   | 89   | 83      | 78   | 91   |
| 50               | 60  | 56   | 83   | 90   | 100  | 88   | 90   | 88   | 95   | 80   | 58   | 87   | 80      | 75   | 88   |

Table 1.B

| #<br>Randomgenes | Fur |      |      | Metj |      |      | LexA |      |      | PhoP |      |      | Overall |      |      |
|------------------|-----|------|------|------|------|------|------|------|------|------|------|------|---------|------|------|
|                  | Rec | Sens | Spec | Rec  | Sens | Spec | Rec  | Sens | Spec | Rec  | Sens | Spec | Rec     | Sens | Spec |
| 10               | 40  | 100  | 49   | 0    | -    | -    | 20   | 100  | 53   | 0    | -    | -    | 15      | 100  | 51   |
| 20               | 30  | 100  | 51   | 0    | -    | -    | 10   | 100  | 68   | 0    | -    | -    | 10      | 100  | 59   |
| 30               | 20  | 100  | 45   | 0    | -    | -    | 10   | 100  | 61   | 0    | -    | -    | 8       | 100  | 53   |
| 40               | 10  | 100  | 54   | 0    | -    | -    | 10   | 100  | 54   | 0    | -    | -    | 5       | 100  | 54   |
| 50               | 10  | 100  | 48   | 0    | -    | -    | 0    | -    | -    | 0    | -    | -    | 3       | 100  | 48   |

Table 1.C

| #<br>Randomgenes | Fur |      |      | Metj |      |      | LexA |      |      | PhoP |      |      | Overall |      |      |
|------------------|-----|------|------|------|------|------|------|------|------|------|------|------|---------|------|------|
|                  | Rec | Sens | Spec | Rec  | Sens | Spec | Rec  | Sens | Spec | Rec  | Sens | Spec | Rec     | Sens | Spec |
| 10               | 100 | 100  | 98   | 0    | -    | -    | 100  | 52   | 100  | 0    | -    | -    | 50      | 76   | 99   |
| 20               | 80  | 98   | 98   | 0    | -    | -    | 100  | 52   | 100  | 0    | -    | -    | 45      | 75   | 99   |
| 30               | 80  | 100  | 98   | 0    | -    | -    | 90   | 47   | 100  | 0    | -    | -    | 43      | 73   | 99   |
| 40               | 70  | 100  | 98   | 0    | -    | -    | 80   | 55   | 100  | 0    | -    | -    | 38      | 78   | 99   |
| 50               | 70  | 97   | 95   | 0    | -    | -    | 80   | 58   | 100  | 0    | -    | -    | 38      | 77   | 97   |
| Overall          | 80  | 99   | 97   | 0    | -    | -    | 90   | 53   | 100  | 0    | -    | -    | 43      | 76   | 99   |
