# Supplementary material for: More robust detection of motifs in coexpressed genes by using phylogenetic information
Source: Springer Nature journal article supplement (doi:10.1186/1471-2105-7-160), 2006-03-20
Supplement: 12859_2005_899_MOESM2_ESM.pdf [file 12859_2005_899_MOESM2_ESM.pdf]

## **Additional data file 2**

This file contains all details of the about the instances of the detected regulatory motifs in the biological cases (PmrA and FNR). For every gene is indicated between brackets whether it contributed to the resulting motif model or whether is was recovered by the screening afterwards with the motif model. For every instance, the gene and accession number is given, the start and end position of the instance relative to the translation start, and the motif instance itself.

## Biological testcase 1: PmrA

### PmrA motif model

| Gene                       | Genome    | Start | End  | Instance             |
|----------------------------|-----------|-------|------|----------------------|
| <b>udg (motif model)</b>   |           |       |      |                      |
| ECs2829                    | NC_002695 | -163  | -145 | TGCTTAATATTAACCTTAAT |
| udg                        | NC_003197 | -163  | -145 | TGCTTAATATTAACCTTAAT |
| ugd                        | NC_000913 | -163  | -145 | TGCTTAATATTAACCTTAAT |
| ugd                        | NC_002655 | -163  | -145 | TGCTTAATATTAACCTTAAT |
| ugd                        | NC_003198 | -163  | -145 | TGCTTAATATTAACCTTAAT |
| ugd                        | NC_004431 | -163  | -145 | TGCTTAATATTAACCTTAAT |
| <b>yfbE (motif model)</b>  |           |       |      |                      |
| ECs3141                    | NC_002695 | -85   | -67  | TTCTTAAGGTTAAGTTAAT  |
| STY2527                    | NC_003198 | -100  | -82  | TTCTTAATGTTAATTTAAT  |
| YPO2422                    | NC_003143 | -139  | -121 | TTCCTAAGGTTTCATTTAAG |
| Z3511                      | NC_002655 | -85   | -67  | TTCTTAAGGTTAAGTTAAT  |
| b2253                      | NC_000913 | -85   | -67  | TTCTTAAGGTTAAGTTAAT  |
| y1917                      | NC_004088 | -139  | -121 | TTCCTAAGGTTTCATTTAAG |
| yfbE                       | NC_003197 | -100  | -82  | TTCTTAATGTTAATTTAAT  |
| yfbE                       | NC_004337 | -118  | -100 | TTCTTAAGGTTAAGTTAAT  |
| yfbE                       | NC_004431 | -85   | -67  | TTCTTAAGGTTAAGTTAAT  |
| <b>yibD (motif model)</b>  |           |       |      |                      |
| ECs4493                    | NC_002695 | -68   | -50  | GGCTTAATAGTTTCTTAAT  |
| STY4088                    | NC_003198 | -70   | -52  | GGCTTAATAGTTTCTTAAT  |
| yibD                       | NC_000913 | -68   | -50  | GGCTTAATAGTTTCTTAAT  |
| yibD                       | NC_002655 | -68   | -50  | GGCTTAATAGTTTCTTAAT  |
| yibD                       | NC_003197 | -70   | -52  | GGCTTAATAGTTTCTTAAT  |
| yibD                       | NC_004431 | -68   | -50  | GGCTTAATAGTTTCTTAAT  |
| <b>yjdB (motif model)</b>  |           |       |      |                      |
| ECs5096                    | NC_002695 | -36   | -18  | AACTTAAGGTTGGCTTAAT  |
| STY4492                    | NC_003198 | -66   | -48  | TTCTTAAGGTTCACTTAAT  |
| yjdB                       | NC_000913 | -36   | -18  | AACTTAAGGTTGGCTTAAT  |
| yjdB                       | NC_002655 | -36   | -18  | AACTTAAGGTTGGCTTAAT  |
| yjdB                       | NC_003197 | -66   | -48  | TTCTTAAGGTTCACTTAAT  |
| yjdB                       | NC_004337 | -21   | -3   | AACTTAAGGTTGGCTTAAT  |
| yjdB                       | NC_004431 | -21   | -3   | AACTTAAGGTTGGCTTAAT  |
| y1960                      | NC_004088 | -451  | -433 | TCTTAAGGATTAACCTAAT  |
| YPO2377                    | NC_003143 | -48   | -30  | TCGATATTCTTTAGGTAAT  |
| <b>STM1269 (screening)</b> |           |       |      |                      |
| STM1269                    | NC_003197 | -63   | -45  | TACTTAATGTTATCTTAAT  |
| aroQ                       | NC_003198 | -63   | -45  | TACTTAATGTTATCTTAAT  |
| <b>ais (screening)</b>     |           |       |      |                      |
| ais                        | NC_003197 | -65   | -47  | TGCGGAATTTTCATTTAAT  |
| <b>ybjG (screening)</b>    |           |       |      |                      |
| ybjG                       | NC_003197 | -190  | -172 | ACTTTAAGGTTAATTTAAG  |
| ybjG                       | NC_003198 | -190  | -172 | ACTTTAAGGTTAATTTAAG  |
| <b>ygiW (screening)</b>    |           |       |      |                      |
| STY3353                    | NC_003198 | -58   | -40  | TTGTTAAGGATTACCTTAT  |
| ygiW                       | NC_003197 | -58   | -40  | TTGTTAAGGATTACCTTAT  |
| <b>yjiP (screening)</b>    |           |       |      |                      |
| yjiP                       | NC_003197 | -66   | -48  | TGCTTCAGATTCTTTAAG   |
| yjiP                       | NC_003198 | -66   | -48  | TGCTTCAGATTCTTTAAG   |
| <b>yegH (screening)</b>    |           |       |      |                      |
| yegH                       | NC_003197 | -262  | -244 | AGATTAATATTAATGAAT   |
| yegH                       | NC_003198 | -262  | -244 | AGATTAATATTAATGAAT   |

## Unknown motif model

| <i>Gene</i>                         | <i>Genome</i> | <i>Start</i> | <i>End</i> | <i>Instance</i> |
|-------------------------------------|---------------|--------------|------------|-----------------|
| <b><i>tufA (motif model)</i></b>    |               |              |            |                 |
| ECs4190                             | NC_002695     | -15          | -7         | TAAGGAATA       |
| tufA                                | NC_000913     | -15          | -7         | TAAGGAATA       |
| tufA                                | NC_002655     | -15          | -7         | TAAGGAATA       |
| tufA                                | NC_003143     | -15          | -7         | TAAGGAATA       |
| tufA                                | NC_003197     | -15          | -7         | TAAGGAATA       |
| tufA                                | NC_003198     | -15          | -7         | TAAGGAATA       |
| tufB                                | NC_004088     | -946         | -938       | TAAGCAATA       |
| <b><i>yihT (motif model)</i></b>    |               |              |            |                 |
| ECs4804                             | NC_002695     | -15          | -7         | AAAGGAATA       |
| yihT                                | NC_000913     | -15          | -7         | AAAGGAATA       |
| yihT                                | NC_002655     | -15          | -7         | AAAGGAATA       |
| yihT                                | NC_003197     | -14          | -6         | AAAGGAAAA       |
| yihT                                | NC_003198     | -14          | -6         | AAAGGAAAA       |
| yihT                                | NC_004337     | -15          | -7         | AAAGGAATA       |
| <b><i>STM2186 (motif model)</i></b> |               |              |            |                 |
| ECs3038                             | NC_002695     | -14          | -6         | TAAGGAAGA       |
| STM2186                             | NC_003197     | -14          | -6         | TAAGGAAGA       |
| STY2416                             | NC_003198     | -14          | -6         | TAAGGAAGA       |
| Z3401                               | NC_002655     | -14          | -6         | TAAGGAAGA       |
| b2146                               | NC_000913     | -14          | -6         | TAAGGAAGA       |
| yeiT                                | NC_004337     | -14          | -6         | TAAGGAAGA       |
| yeiT                                | NC_004431     | -14          | -6         | TAAGGAAGA       |
| <b><i>sopD (screening)</i></b>      |               |              |            |                 |
| sopD                                | NC_003197     | -14          | -6         | GAAGGAAAA       |
| sopD                                | NC_003198     | -14          | -6         | GAAGGAAAA       |
| <b><i>STM1472 (screening)</i></b>   |               |              |            |                 |
| STM1472                             | NC_003197     | -9           | -1         | AAAGGAACA       |
| STY1650                             | NC_003198     | -9           | -1         | AAAGGAACA       |

## Biological testcase 1: FNR

### FNR motif model

| Gene                             | Genome    | Start | End  | Instance       |
|----------------------------------|-----------|-------|------|----------------|
| <b><i>narX (motif model)</i></b> |           |       |      |                |
| ECs1727                          | NC_002695 | -242  | -230 | TTGATATTTATCA  |
| narX                             | NC_000913 | -242  | -230 | TTGATATTTATCA  |
| narX                             | NC_002655 | -242  | -230 | TTGATATTTATCA  |
| narX                             | NC_003143 | -173  | -161 | GTGATTTATTTTA  |
| narX                             | NC_003197 | -282  | -270 | TTGATATAAATCA  |
| narX                             | NC_003198 | -281  | -269 | TTGATATAAATCA  |
| narX                             | NC_004088 | -149  | -137 | GTGATTTATTTTA  |
| narX                             | NC_004337 | -242  | -230 | TTGATATTTATCA  |
| <b><i>nirB (motif model)</i></b> |           |       |      |                |
| ECs4216                          | NC_002695 | -73   | -61  | TTGATTTACATCA  |
| nirB                             | NC_000913 | -73   | -61  | TTGATTTACATCA  |
| nirB                             | NC_002655 | -73   | -61  | TTGATTTACATCA  |
| nirB                             | NC_003143 | -72   | -60  | TTGATTTACATCA  |
| nirB                             | NC_003197 | -73   | -61  | TTGATTTACATCA  |
| nirB                             | NC_003198 | -73   | -61  | TTGATTTACATCA  |
| nirB                             | NC_004088 | -72   | -60  | TTGATTTACATCA  |
| nirB                             | NC_004337 | -109  | -97  | TTGATTTACATCA  |
| <b><i>ndh (motif model)</i></b>  |           |       |      |                |
| ECs1487                          | NC_002695 | -151  | -139 | TTGATTAACATCA  |
| YPO1617                          | NC_003143 | -149  | -137 | TTGATATATATCA  |
| ndh                              | NC_000913 | -151  | -139 | TTGATTAACATCA  |
| ndh                              | NC_002655 | -151  | -139 | TTGATTAACATCA  |
| ndh                              | NC_003197 | -151  | -139 | TTGATGCACATCA  |
| ndh                              | NC_003198 | -151  | -139 | TTGATGCACATCA  |
| ndh                              | NC_004088 | -149  | -137 | TTGATATATATCA  |
| ndh                              | NC_004337 | -124  | -112 | TTGATTAACATCA  |
| ndh                              | NC_004431 | -124  | -112 | TTGATTAACATCA  |
| <b><i>cydA (motif model)</i></b> |           |       |      |                |
| ECs0768                          | NC_002695 | -349  | -337 | TTGATATAAATCA  |
| cydA                             | NC_000913 | -346  | -334 | TTGATATTTATCA  |
| cydA                             | NC_002655 | -349  | -337 | TTGATATAAATCA  |
| cydA                             | NC_003143 | -315  | -303 | TTGTTCTAAATCA  |
| cydA                             | NC_003197 | -350  | -338 | TTGATTTTAATCA  |
| cydA                             | NC_003198 | -350  | -338 | TTGATTTTAATCA  |
| cydA                             | NC_004088 | -315  | -303 | TTGTTCTAAATCA  |
| cydA                             | NC_004337 | -346  | -334 | TTGATATTTATCA  |
| cydA                             | NC_004431 | -349  | -337 | TTGATATAAATCA  |
| <b><i>cyoA (screening)</i></b>   |           |       |      |                |
| ECs0486                          | NC_002695 | -242  | -230 | TTGTTTTATTTTCG |
| cyoA                             | NC_000913 | -242  | -230 | TTGTTTTATTTCA  |
| cyoA                             | NC_002655 | -242  | -230 | TTGTTTTATTTTCG |
| cyoA                             | NC_003197 | -322  | -310 | TTTCTTTACACGA  |
| cyoA                             | NC_003198 | -322  | -310 | TTTCTTTACACGA  |
| <b><i>dcuC (screening)</i></b>   |           |       |      |                |
| ECs0660                          | NC_002695 | -104  | -92  | TTGATTTTAATCA  |
| dcuC                             | NC_000913 | -104  | -92  | TTGATTTTAATCA  |
| dcuC                             | NC_002655 | -104  | -92  | TTGATTTTAATCA  |
| dcuC                             | NC_003197 | -102  | -90  | GTGATTTTAATCA  |
| dcuC                             | NC_003198 | -102  | -90  | GTGATTTTAATCA  |
| dcuC                             | NC_004431 | -104  | -92  | TTGATTTTAATCA  |

| <b><i>frdA (screening)</i></b> |           |      |      |               |
|--------------------------------|-----------|------|------|---------------|
| frdA                           | NC_003197 | -192 | -180 | TTAATCAAAATCA |
| frdA                           | NC_003198 | -192 | -180 | TTAATCAAAATCA |
| frdA                           | NC_004088 | -190 | -178 | ATTCTTAATATCA |
